# Supplementary material for: A Remarkable Difference in Pharmacokinetics of Fluorinated Versus Iodinated Photosensitizers Derived from Chlorophyll-a and a Direct Correlation between the Tumor Uptake and Anti-Cancer Activity
Source: MDPI journal article supplement (doi:10.3390/molecules28093782), 2023-04-27
Supplement: s1 [file s1]

## Supporting Material Information

---

### Synthesis, Photophysical and Anticancer Activity of Isomeric Fluorinated Photosensitizers with a Known Iodinated Analog Derived from Chlorophyll-a in Bladder and Brain Tumor Models: Similarities and Differences

Taur Prakash Pandurang<sup>1</sup>, Joseph Cacaccio<sup>2</sup>, Faruk Durrani<sup>2</sup>, Mykhaylo Dukh<sup>2</sup>, Ajyal Z Alsatch<sup>3</sup>, Munawwar Sajjad<sup>4</sup>, Francis D'Souza<sup>3,\*</sup>, Dalip Kumar<sup>1,\*</sup>, and Ravindra K Pandey<sup>2,\*</sup>

<sup>1</sup> Department of Chemistry, Birla Institute of Technology and Science, Pilani, Rajasthan (India)

<sup>2</sup>PDT Center, Cell Stress Biology, Roswell Park Comprehensive Cancer Center, Buffalo, NY 14263 (USA)

<sup>3</sup>Department of Chemistry, University of North Texas, 1155 Union Circle, #305070, Denton, TX 76203-5017 (USA)

<sup>4</sup>Department of Nuclear Medicine, University of Buffalo, NY 14221 (USA)

---

#### LIST OF CONTENTS:

|                   |                                          |        |
|-------------------|------------------------------------------|--------|
| <b>Figure S1</b>  | <sup>1</sup> H NMR spectrum of <b>3</b>  | Page 3 |
| <b>Figure S2</b>  | <sup>13</sup> C NMR spectrum of <b>3</b> | Page 3 |
| <b>Figure S3</b>  | <sup>19</sup> F NMR spectrum of <b>3</b> | Page 4 |
| <b>Figure S4</b>  | Mass spectrum of <b>3</b>                | Page 4 |
| <b>Figure S5</b>  | <sup>1</sup> H NMR spectrum of <b>5</b>  | Page 5 |
| <b>Figure S6</b>  | <sup>13</sup> C NMR spectrum of <b>5</b> | Page 5 |
| <b>Figure S7</b>  | <sup>19</sup> F NMR spectrum of <b>5</b> | Page 6 |
| <b>Figure S8</b>  | Mass spectrum of <b>5</b>                | Page 6 |
| <b>Figure S9</b>  | <sup>1</sup> H NMR spectrum of <b>7</b>  | Page 7 |
| <b>Figure S10</b> | <sup>13</sup> C NMR Spectrum of <b>7</b> | Page 7 |
| <b>Figure S11</b> | <sup>19</sup> F NMR spectrum of <b>7</b> | Page 8 |

|                    |                                          |         |
|--------------------|------------------------------------------|---------|
| <b>Figure S12</b>  | Mass spectrum of <b>7</b>                | Page 8  |
| <b>Figure S13</b>  | $^1\text{H}$ NMR spectrum of <b>4</b>    | Page 9  |
| <b>Figure S14</b>  | $^{13}\text{C}$ NMR spectrum of <b>4</b> | Page 9  |
| <b>Figure S15</b>  | $^{19}\text{F}$ NMR spectrum of <b>4</b> | Page 10 |
| <b>Figure S16</b>  | Mass spectrum of <b>4</b>                | Page 10 |
| <b>Figure S17</b>  | $^1\text{H}$ NMR spectrum of <b>6</b>    | Page 11 |
| <b>Figure S18</b>  | $^{13}\text{C}$ NMR spectrum of <b>6</b> | Page 11 |
| <b>Figure S19</b>  | $^{19}\text{F}$ NMR spectrum of <b>6</b> | Page 12 |
| <b>Figure S20</b>  | Mass spectrum of <b>6</b>                | Page 12 |
| <b>Figure S21</b>  | $^1\text{H}$ NMR spectrum of <b>8</b>    | Page 13 |
| <b>Figure S22</b>  | $^{13}\text{C}$ NMR spectrum of <b>8</b> | Page 13 |
| <b>Figure S23</b>  | $^{19}\text{F}$ NMR spectrum of <b>8</b> | Page 14 |
| <b>Figure S24</b>  | $^{19}\text{F}$ NMR spectrum of <b>8</b> | Page 14 |
| <b>Figure S25</b>  | Molecular Formula Strings Spread sheet   | Page 15 |
| <b>Figure S26.</b> | HPLC analysis                            | Page 16 |
| <b>Figure S27</b>  | HPLC chromatogram pf <b>3</b>            | Page 17 |
| <b>Figure S28</b>  | HPLC chromatogram of <b>5</b>            | Page 18 |
| <b>Figure S29</b>  | HPLC chromatogram of <b>7</b>            | Page 19 |
| <b>Figure S30</b>  | HPLC chromatogram pf <b>4</b>            | Page 20 |
| <b>Figure S31</b>  | HPLC chromatogram of <b>6</b>            | Page 21 |
| <b>Figure S32</b>  | HPLC chromatogram of <b>8</b>            | Page 22 |

Figure S1:  $^1\text{H}$  NMR spectrum of 3

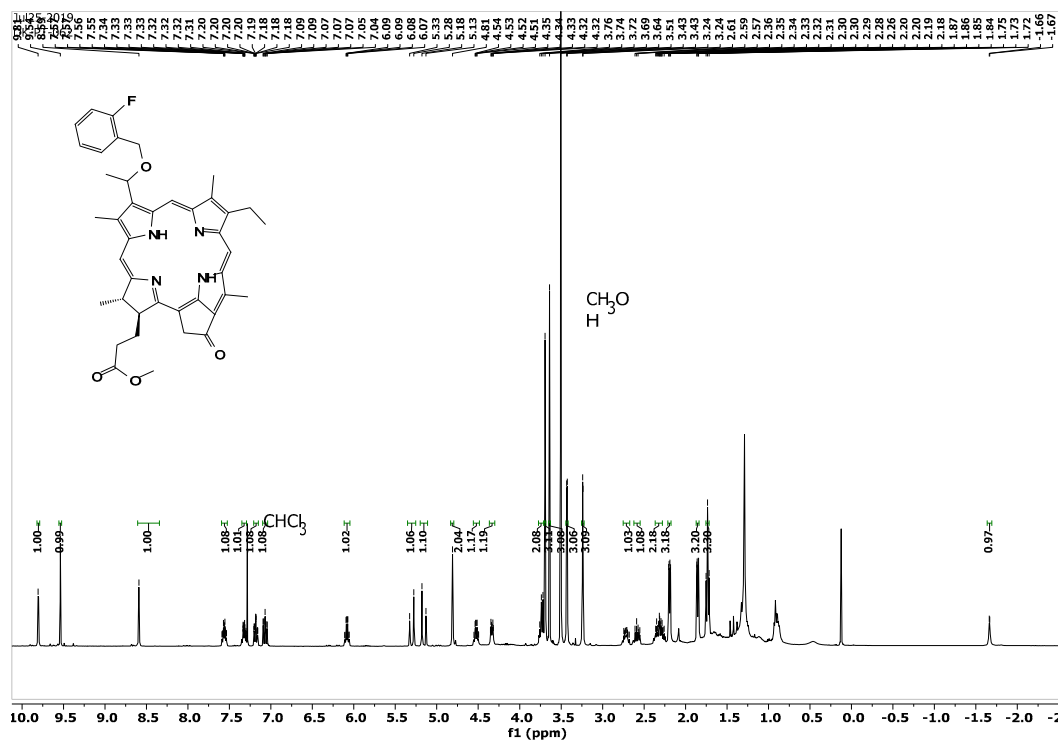

Figure S2:  $^{13}\text{C}$  NMR spectrum of 3

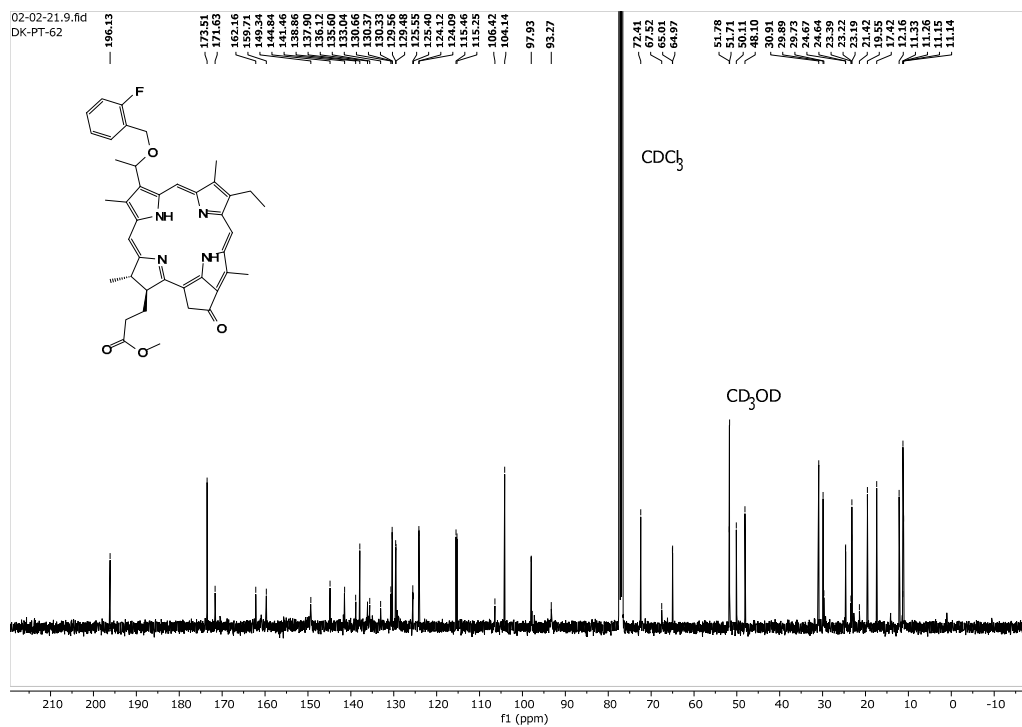

Figure S3:  $^{19}\text{F}$  NMR spectrum of 3

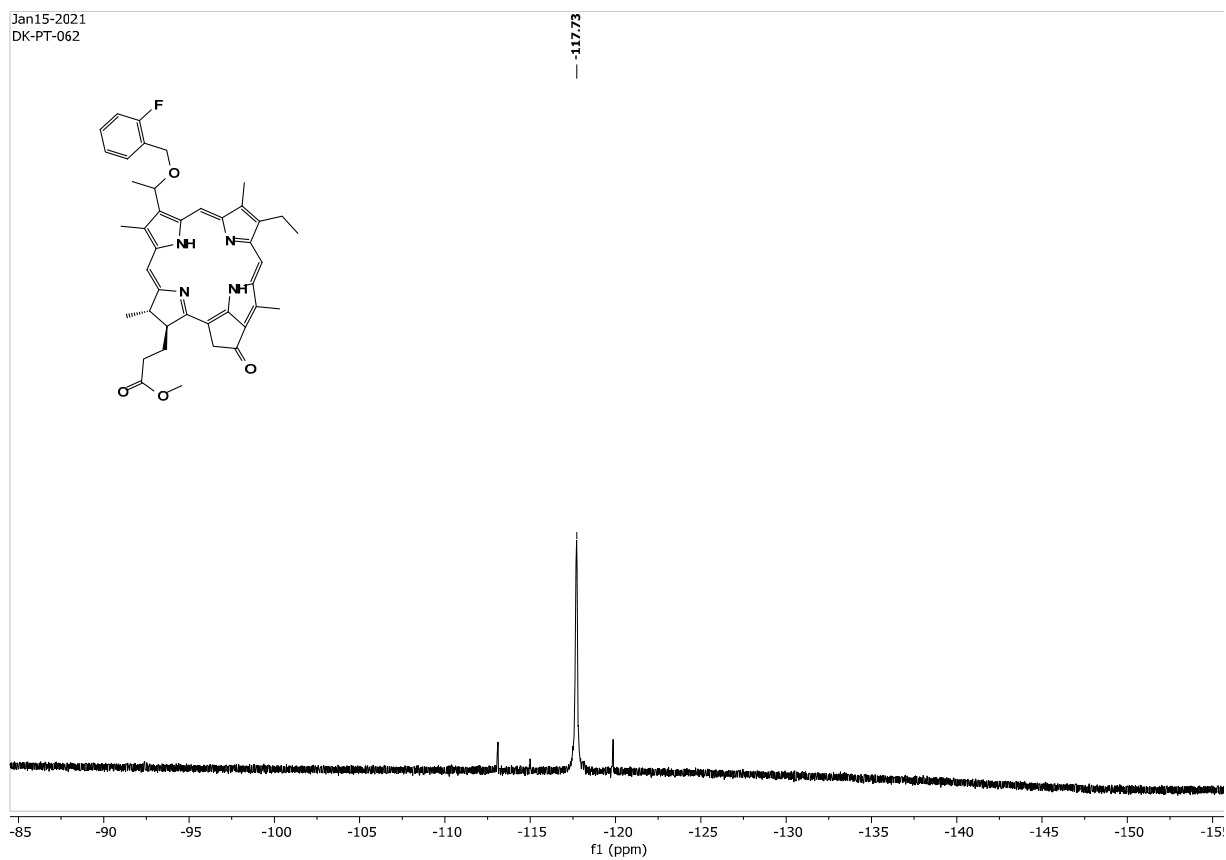

Figure S4: Mass spectrum of 3

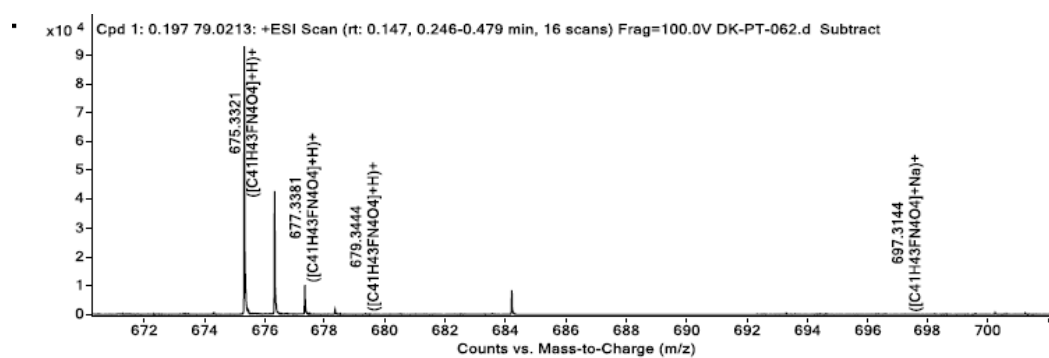

MS Spectrum Peak List

| m/z      | Calc m/z | Diff(ppm) | z | Abund    | Formula                                                        | Ion                 |
|----------|----------|-----------|---|----------|----------------------------------------------------------------|---------------------|
| 675.3321 | 675.3341 | 2.99      | 1 | 93689.75 | C <sub>41</sub> H <sub>43</sub> FN <sub>4</sub> O <sub>4</sub> | (M+H) <sup>+</sup>  |
| 676.3354 | 676.3373 | 2.86      | 1 | 42870.63 | C <sub>41</sub> H <sub>43</sub> FN <sub>4</sub> O <sub>4</sub> | (M+H) <sup>+</sup>  |
| 677.3381 | 677.3403 | 3.23      | 1 | 10289.9  | C <sub>41</sub> H <sub>43</sub> FN <sub>4</sub> O <sub>4</sub> | (M+H) <sup>+</sup>  |
| 678.3409 | 678.3433 | 3.45      | 1 | 1688.04  | C <sub>41</sub> H <sub>43</sub> FN <sub>4</sub> O <sub>4</sub> | (M+H) <sup>+</sup>  |
| 679.3444 | 679.3461 | 2.45      | 1 | 252.69   | C <sub>41</sub> H <sub>43</sub> FN <sub>4</sub> O <sub>4</sub> | (M+H) <sup>+</sup>  |
| 697.3144 | 697.3161 | 2.36      | 1 | 78.07    | C <sub>41</sub> H <sub>43</sub> FN <sub>4</sub> O <sub>4</sub> | (M+Na) <sup>+</sup> |

Figure S5:  $^1\text{H}$  NMR spectrum of 5

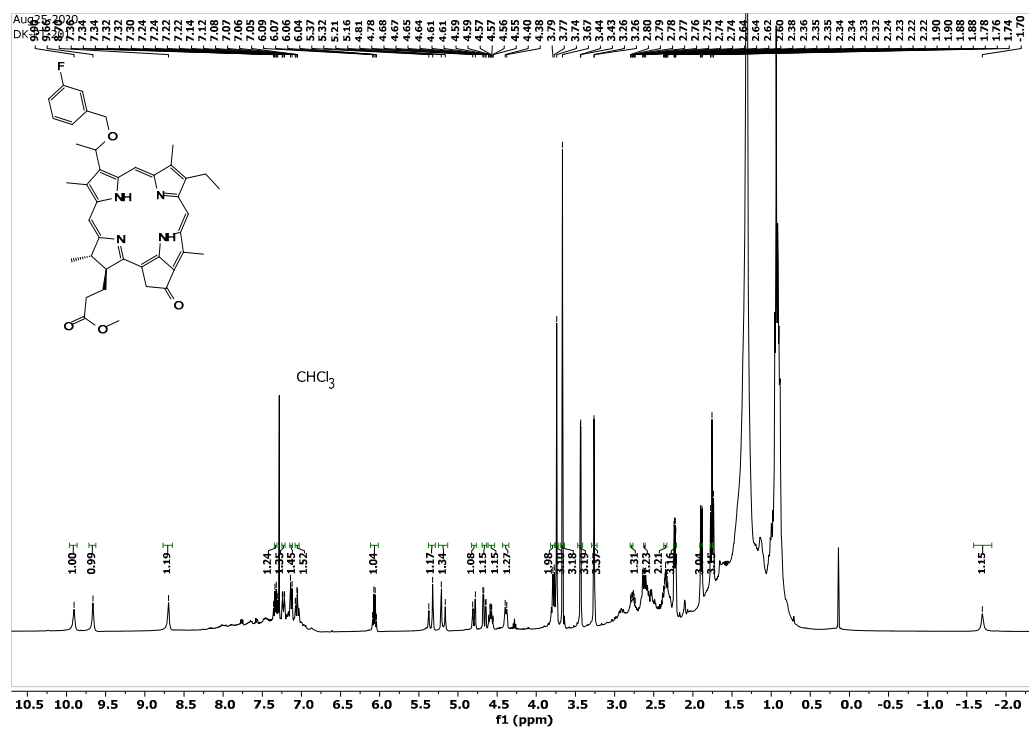

Figure S6:  $^{13}\text{C}$  NMR spectrum of 5

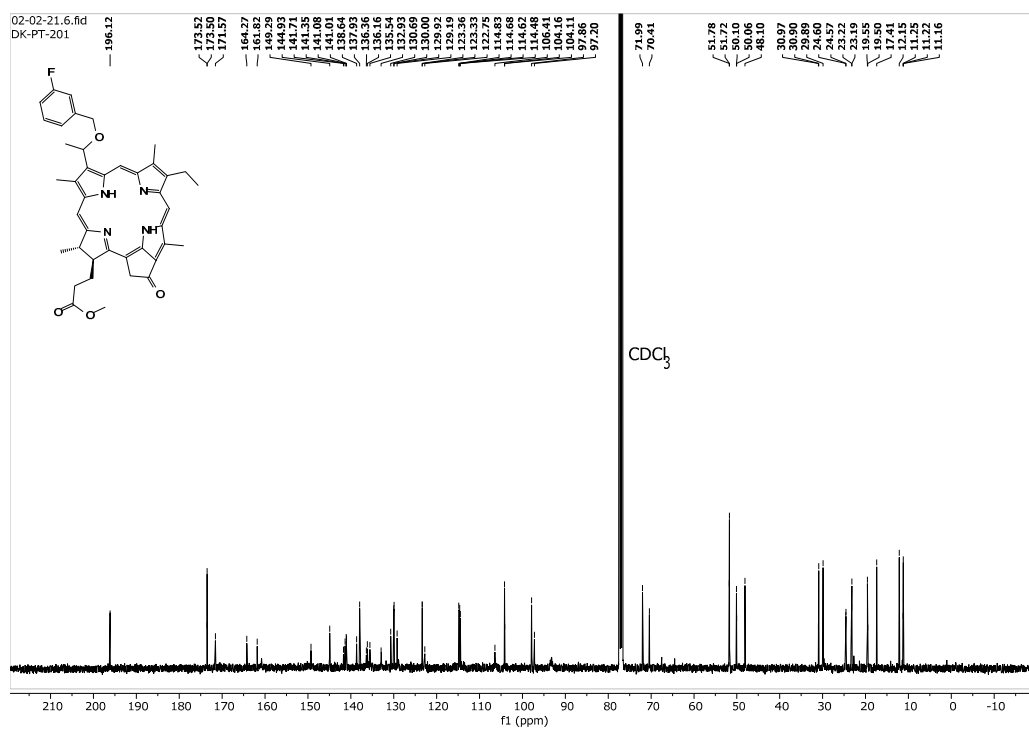

Figure S7:  $^{19}\text{F}$  NMR spectrum of 5

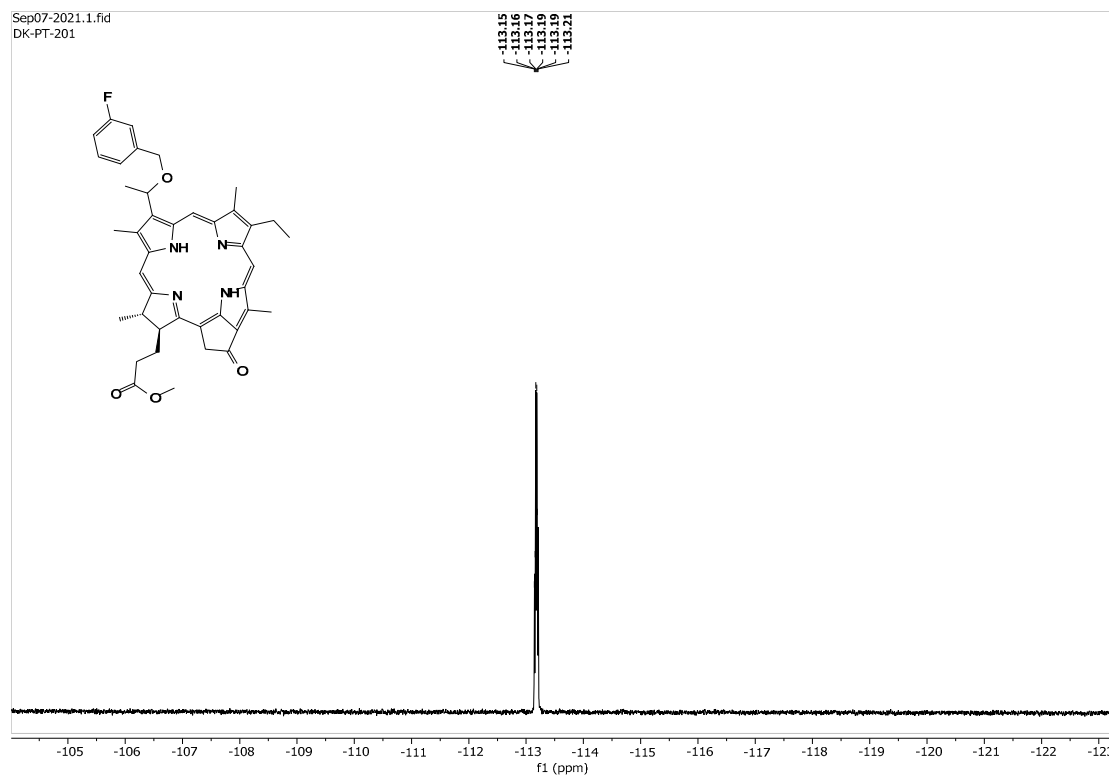

Figure S8: Mass spectrum of 5

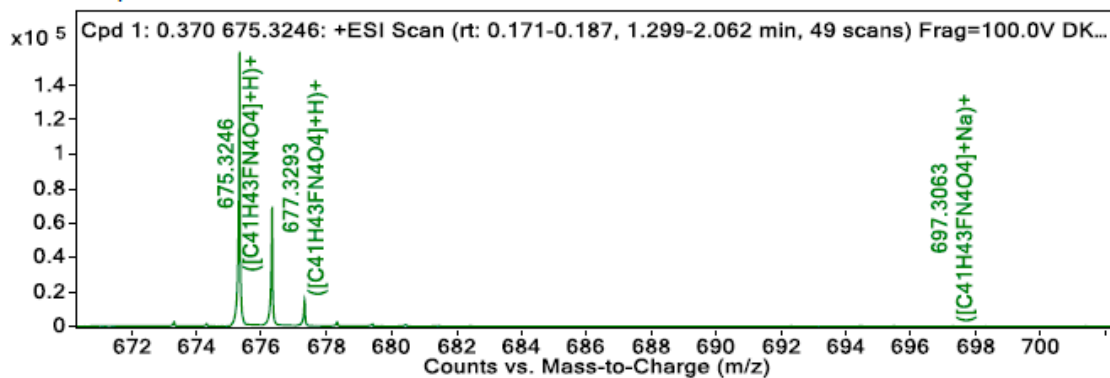

MS Spectrum Peak List

| $m/z$    | Calc $m/z$ | Diff(ppm) | z | Abund     | Formula     | Ion     |
|----------|------------|-----------|---|-----------|-------------|---------|
| 675.3246 | 675.3341   | 14.11     | 1 | 159836.96 | C41H43FN4O4 | (M+H)+  |
| 676.3272 | 676.3373   | 14.91     | 1 | 69399.42  | C41H43FN4O4 | (M+H)+  |
| 677.3293 | 677.3403   | 16.34     | 1 | 15537.04  | C41H43FN4O4 | (M+H)+  |
| 678.3318 | 678.3433   | 16.88     | 1 | 2574.44   | C41H43FN4O4 | (M+H)+  |
| 697.3063 | 697.3161   | 14.05     | 1 | 122.01    | C41H43FN4O4 | (M+Na)+ |
| 698.308  | 698.3192   | 16.13     | 1 | 60.22     | C41H43FN4O4 | (M+Na)+ |

Figure S9:  $^1\text{H}$  NMR spectrum of 7

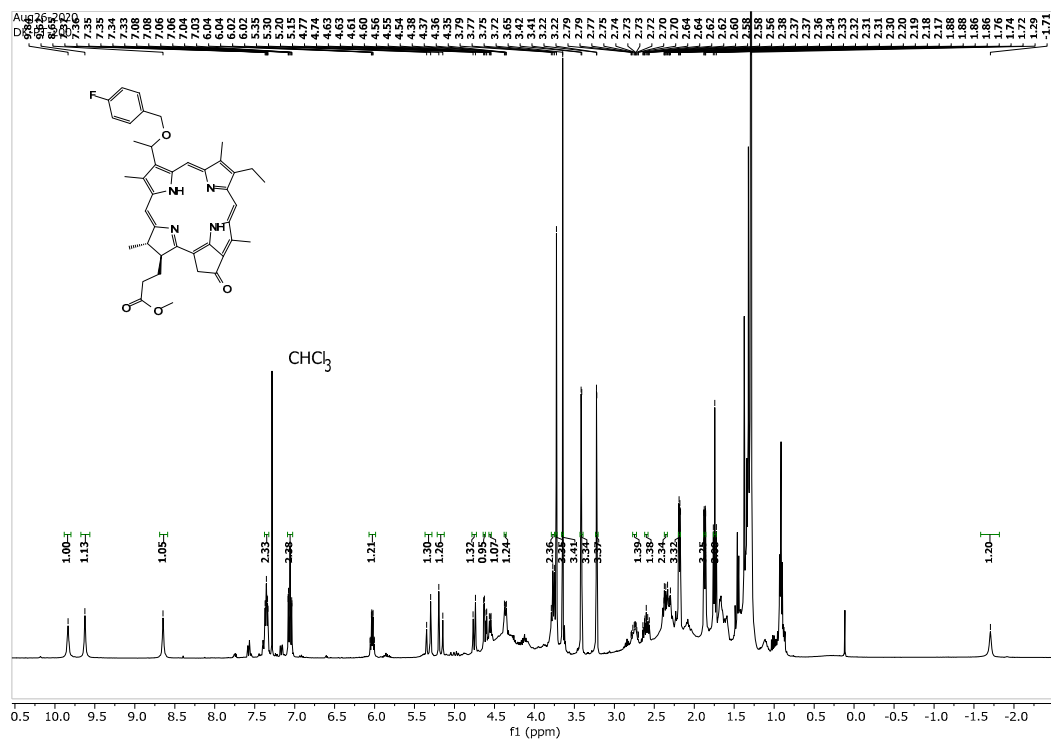

Figure S10:  $^{13}\text{C}$  NMR spectrum of 7

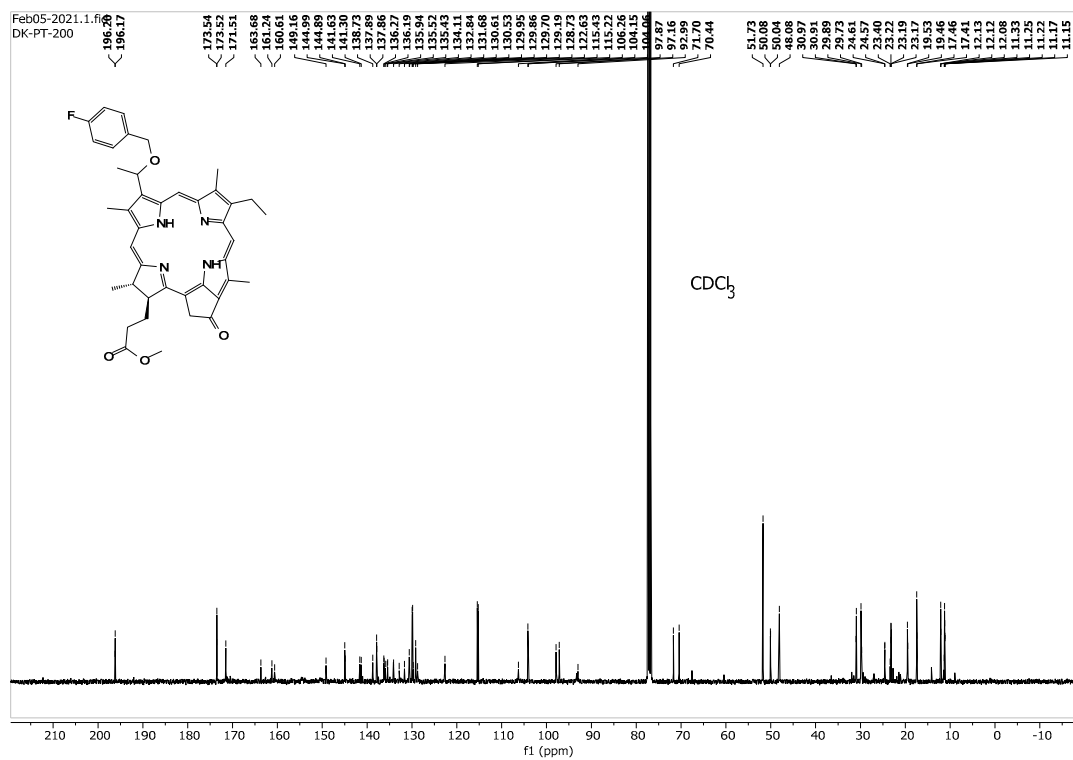

Figure S11:  $^{19}\text{F}$  NMR spectrum of 7

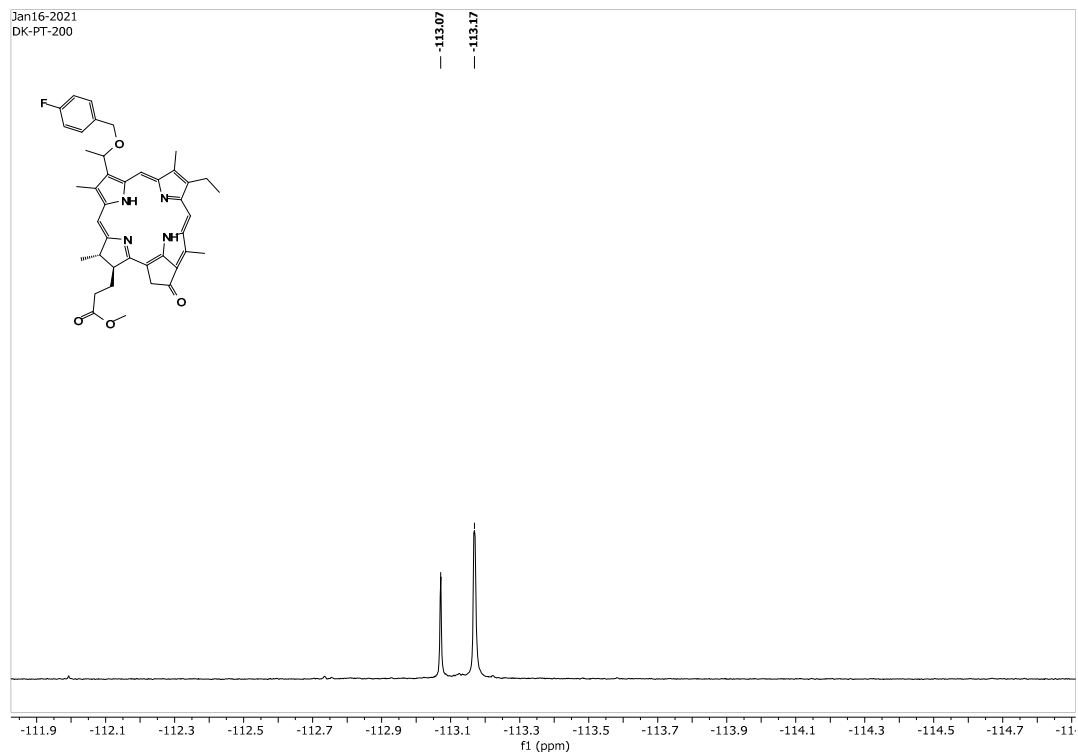

Figure S12: Mass spectrum of 7

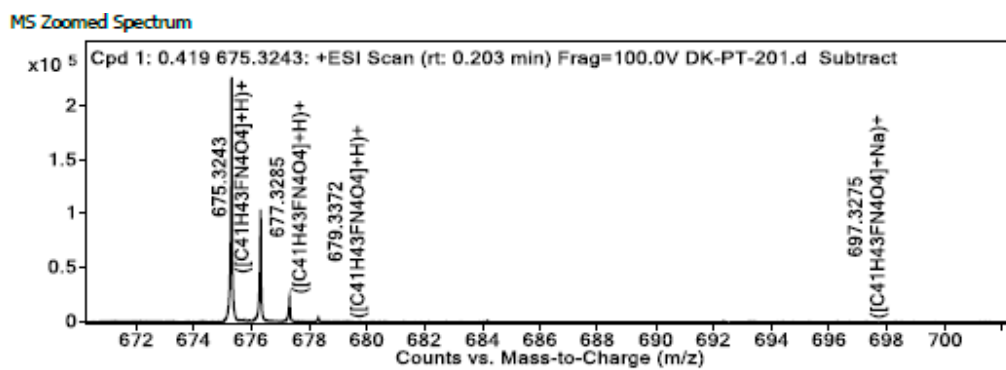

MS Spectrum Peak List

| m/z      | Calc m/z | Diff(ppm) | z | Abund     | Formula     | Ion     |
|----------|----------|-----------|---|-----------|-------------|---------|
| 675.3243 | 675.3341 | 14.57     | 1 | 228580.18 | C41H43FN4O4 | (M+H)+  |
| 676.3273 | 676.3373 | 14.86     | 1 | 103767.15 | C41H43FN4O4 | (M+H)+  |
| 677.3285 | 677.3403 | 17.43     | 1 | 23242.15  | C41H43FN4O4 | (M+H)+  |
| 678.3292 | 678.3433 | 20.79     | 1 | 4192.99   | C41H43FN4O4 | (M+H)+  |
| 679.3372 | 679.3461 | 13.04     | 1 | 623.11    | C41H43FN4O4 | (M+H)+  |
| 697.3275 | 697.3161 | -16.4     | 1 | 116.86    | C41H43FN4O4 | (M+Na)+ |



Figure S13:  $^1\text{H}$  NMR spectrum of 4

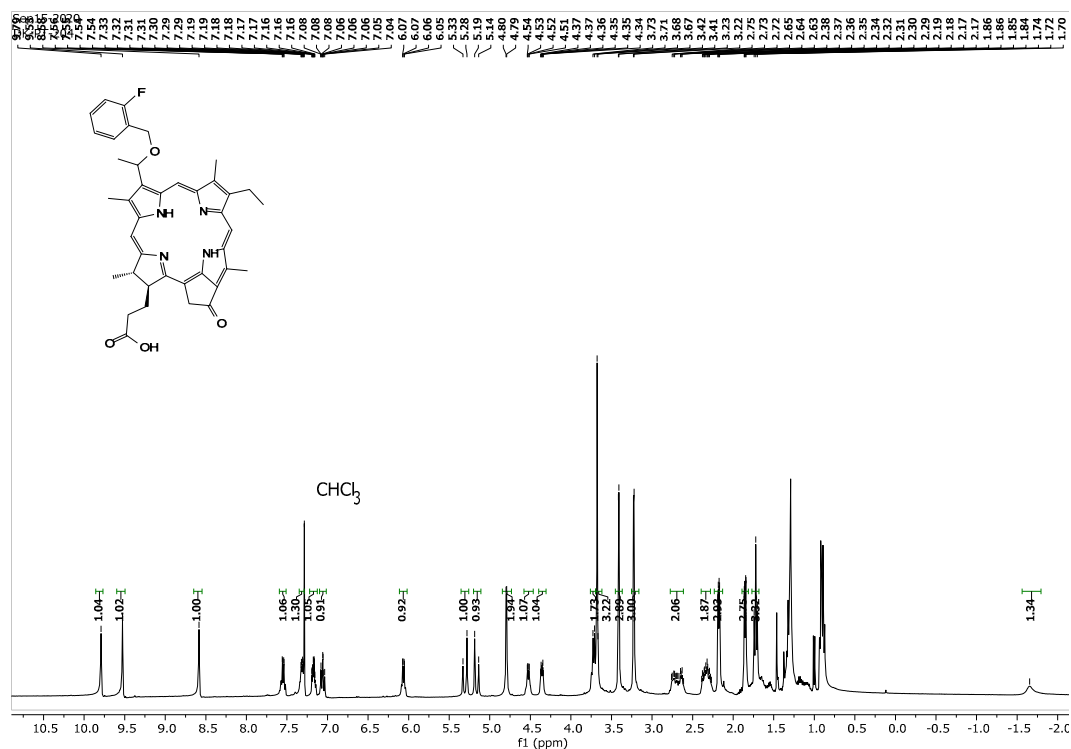

**Figure S15:  $^{19}\text{F}$  NMR spectrum of 4**

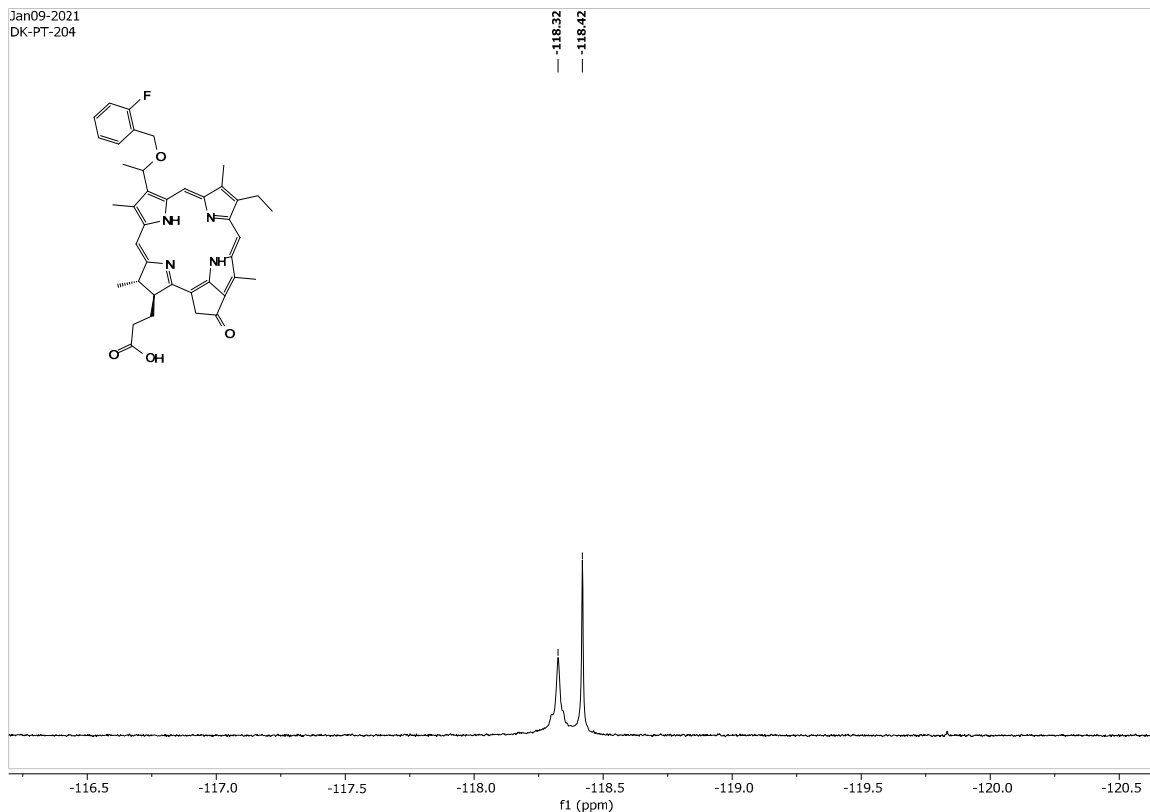

**Figure S16: Mass spectrum of 4**

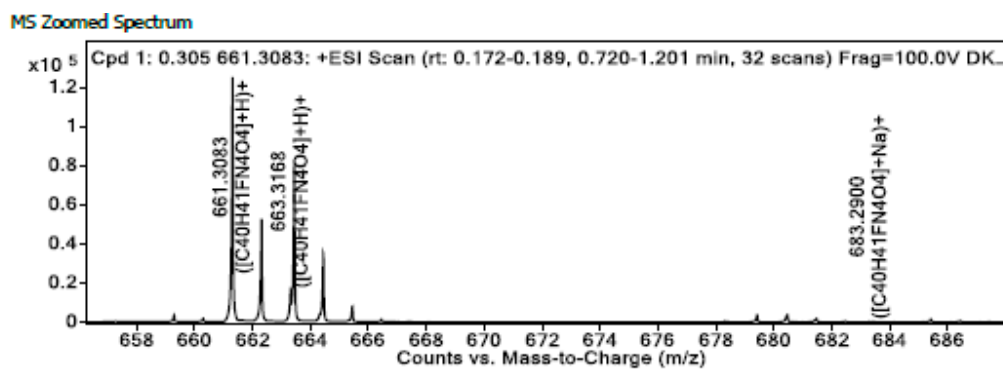

### MS Spectrum Peak List

| <i>m/z</i> | <i>Calc m/z</i> | Diff(ppm) | z | Abund     | Formula     | Ion     |
|------------|-----------------|-----------|---|-----------|-------------|---------|
| 661.3083   | 661.3185        | 15.3      | 1 | 125380.18 | C40H41FN4O4 | (M+H)+  |
| 662.3111   | 662.3216        | 15.95     | 1 | 53149.38  | C40H41FN4O4 | (M+H)+  |
| 663.3168   | 663.3247        | 11.93     | 1 | 15932.4   | C40H41FN4O4 | (M+H)+  |
| 683.29     | 683.3004        | 15.17     | 1 | 121.78    | C40H41FN4O4 | (M+Na)+ |
| 684.2936   | 684.3036        | 14.66     | 1 | 63.1      | C40H41FN4O4 | (M+Na)+ |

**Figure S17:  $^1\text{H}$  NMR spectrum of 6**

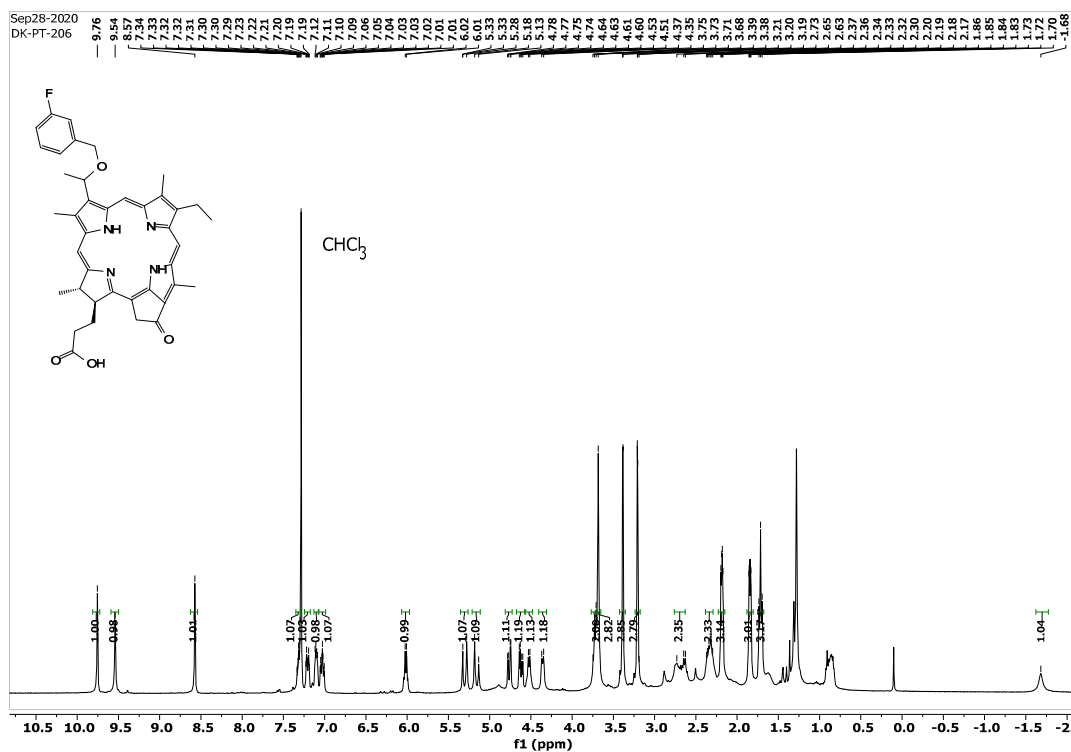

**Figure S18:  $^{13}\text{C}$  NMR spectrum of 6**

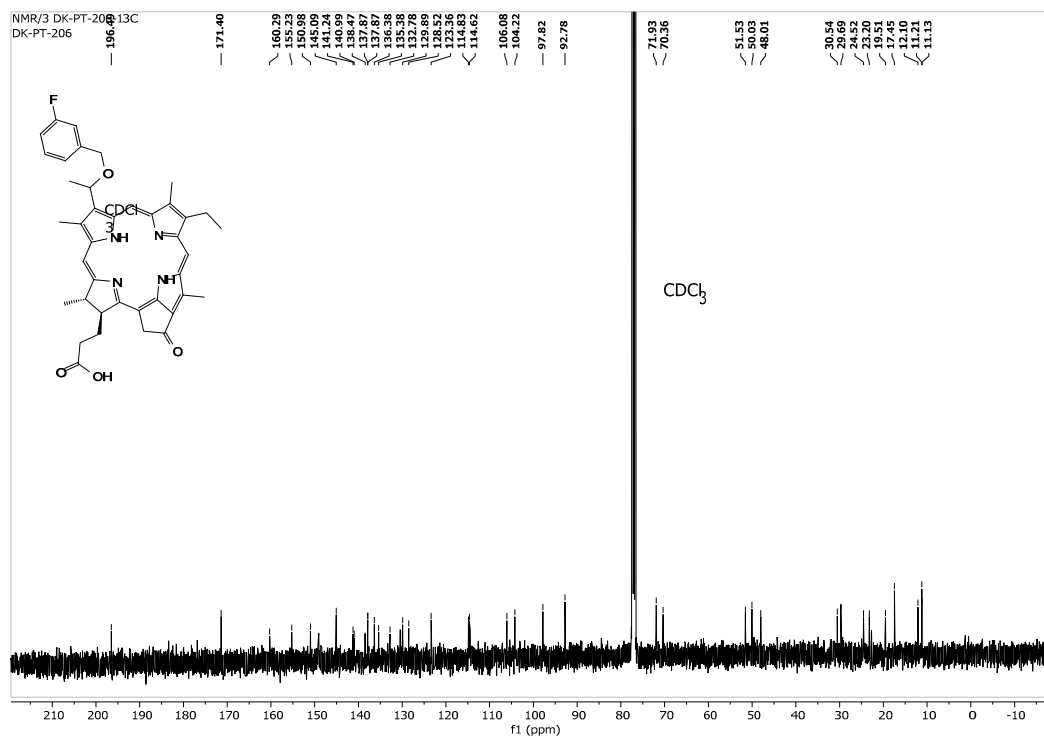

**Figure S19:  $^{19}\text{F}$  NMR spectrum of 6**

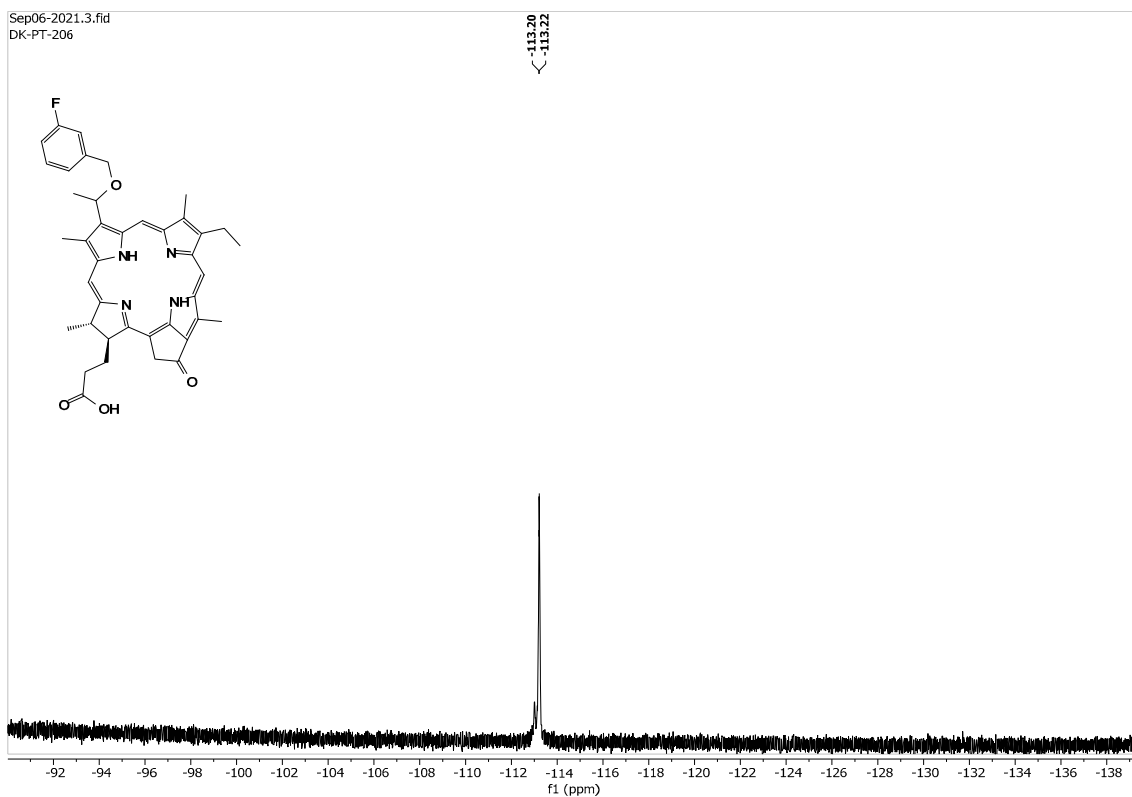

**Figure S20: Mass spectrum of 6**

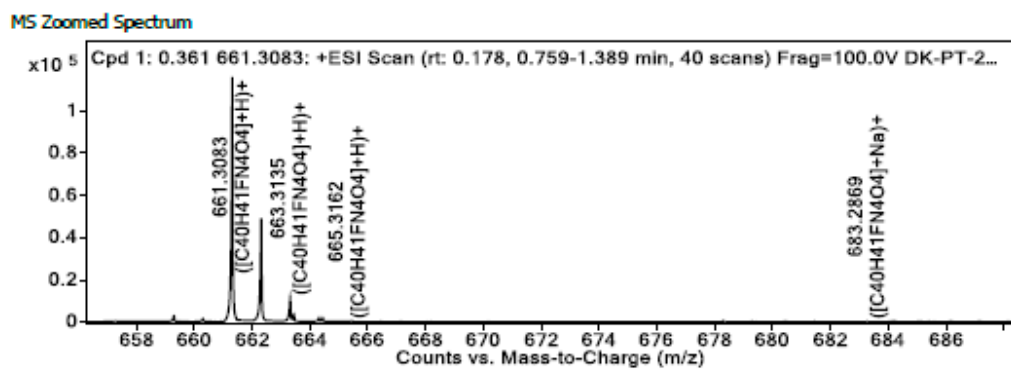

### MS Spectrum Peak List

| <i>m/z</i> | <i>Calc m/z</i> | Diff(ppm) | <i>z</i> | Abund     | Formula     | Ion     |
|------------|-----------------|-----------|----------|-----------|-------------|---------|
| 661.3083   | 661.3185        | 15.39     | 1        | 116156.56 | C40H41FN4O4 | (M+H)+  |
| 662.311    | 662.3216        | 16.15     | 1        | 49524.24  | C40H41FN4O4 | (M+H)+  |
| 663.3135   | 663.3247        | 16.76     | 1        | 11306.08  | C40H41FN4O4 | (M+H)+  |
| 664.3166   | 664.3276        | 16.58     | 1        | 1973.33   | C40H41FN4O4 | (M+H)+  |
| 665.3162   | 665.3304        | 21.37     | 1        | 240.83    | C40H41FN4O4 | (M+H)+  |
| 683.2869   | 683.3004        | 19.82     | 1        | 142.26    | C40H41FN4O4 | (M+Na)+ |
| 684.295    | 684.3036        | 12.57     | 1        | 66.94     | C40H41FN4O4 | (M+Na)+ |

**Figure S21:  $^1\text{H}$  NMR spectrum of 8**

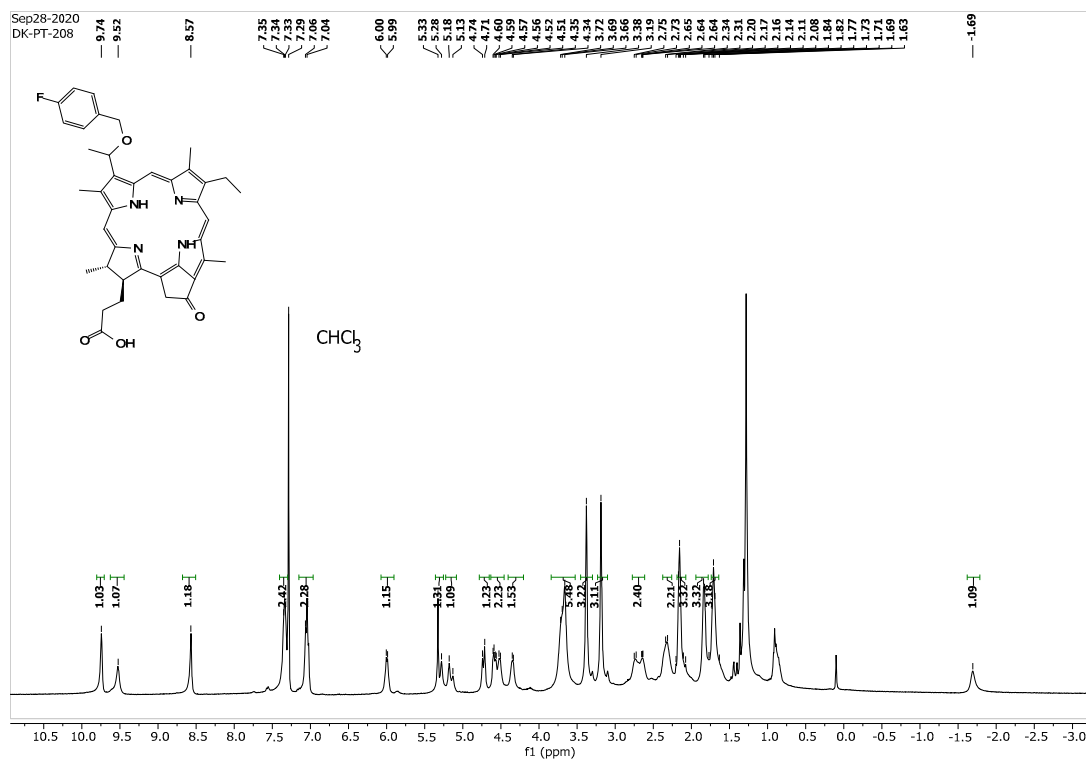

**Figure S22:  $^{13}\text{C}$  NMR spectrum of 8**

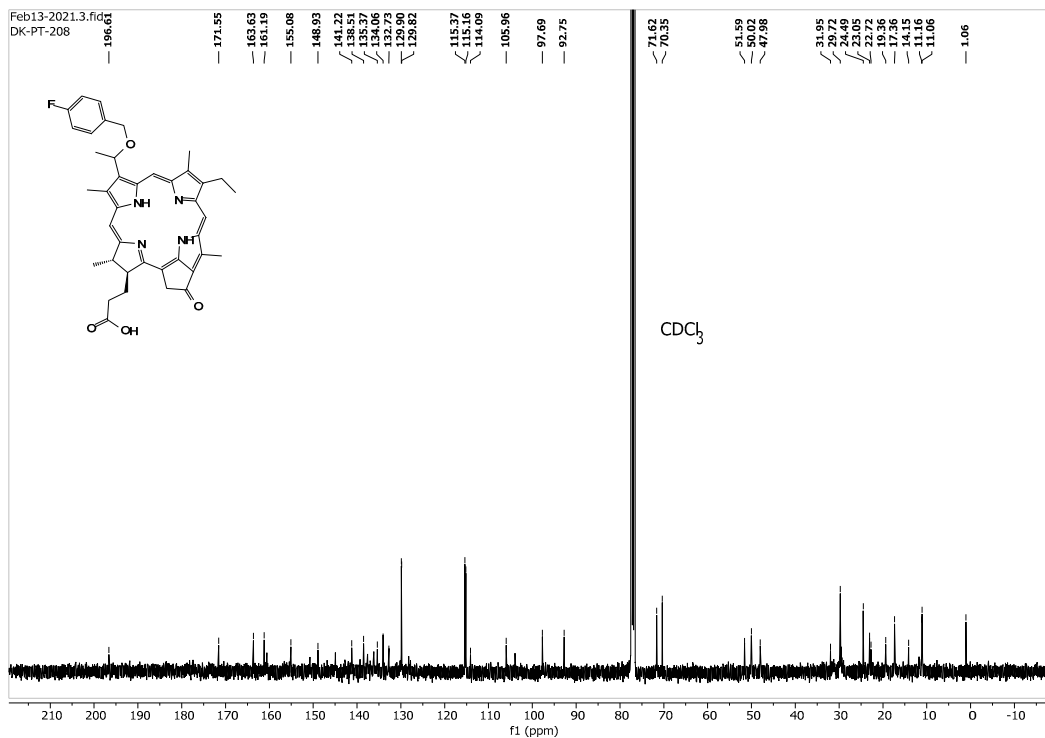

Figure S23:  $^{19}\text{F}$  NMR spectrum of 8

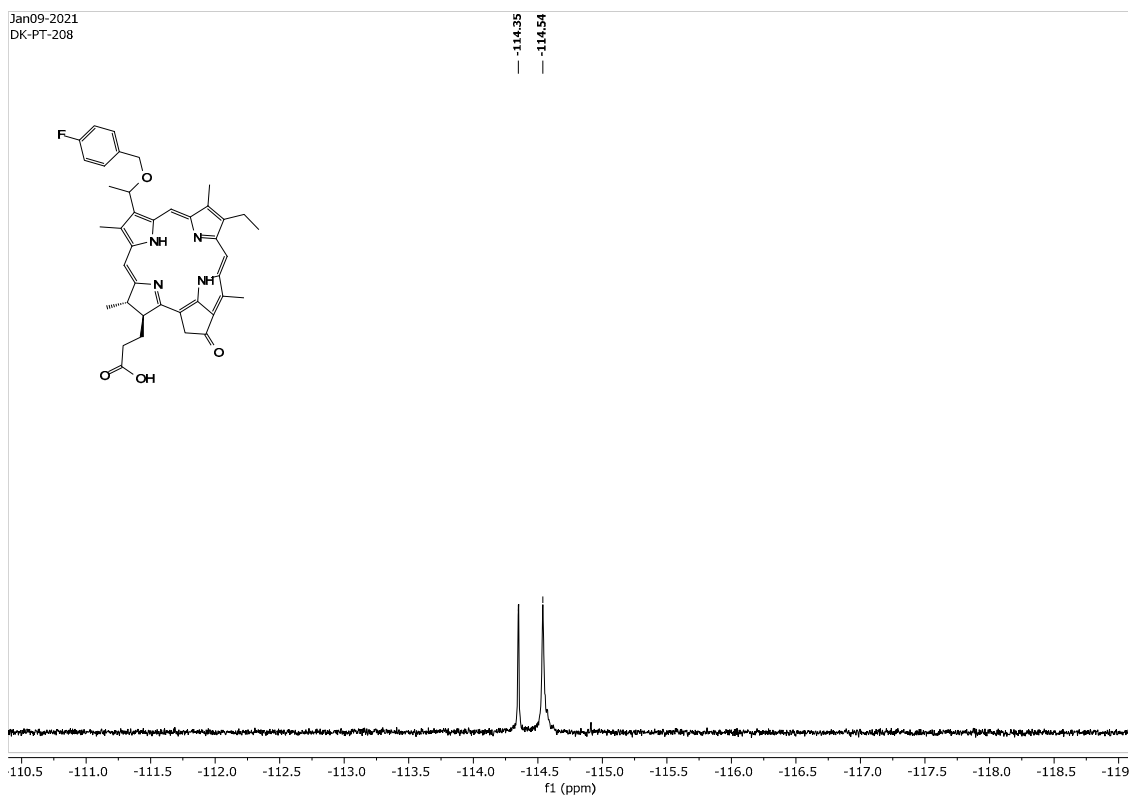

Figure S24: Mass spectrum of 8

MS Zoomed Spectrum

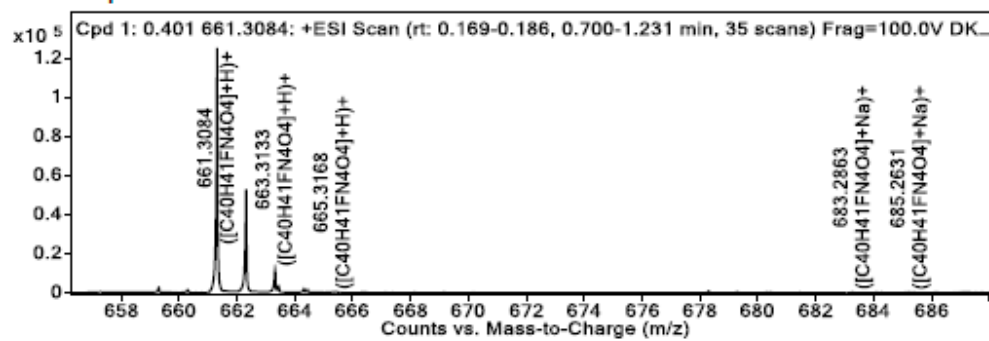

MS Spectrum Peak List

| m/z      | Calc m/z | Diff(ppm) | z | Abund     | Formula                                                        | Ion                 |
|----------|----------|-----------|---|-----------|----------------------------------------------------------------|---------------------|
| 661.3084 | 661.3185 | 15.18     | 1 | 125126.84 | C <sub>40</sub> H <sub>41</sub> FN <sub>4</sub> O <sub>4</sub> | (M+H) <sup>+</sup>  |
| 662.3109 | 662.3216 | 16.18     | 1 | 53093.64  | C <sub>40</sub> H <sub>41</sub> FN <sub>4</sub> O <sub>4</sub> | (M+H) <sup>+</sup>  |
| 663.3133 | 663.3247 | 17.13     | 1 | 12100.66  | C <sub>40</sub> H <sub>41</sub> FN <sub>4</sub> O <sub>4</sub> | (M+H) <sup>+</sup>  |
| 664.3159 | 664.3276 | 17.64     | 1 | 2109.61   | C <sub>40</sub> H <sub>41</sub> FN <sub>4</sub> O <sub>4</sub> | (M+H) <sup>+</sup>  |
| 665.3168 | 665.3304 | 20.46     | 1 | 342.14    | C <sub>40</sub> H <sub>41</sub> FN <sub>4</sub> O <sub>4</sub> | (M+H) <sup>+</sup>  |
| 683.2863 | 683.3004 | 20.69     | 1 | 186.88    | C <sub>40</sub> H <sub>41</sub> FN <sub>4</sub> O <sub>4</sub> | (M+Na) <sup>+</sup> |
| 684.2862 | 684.3036 | 25.47     | 1 | 88.82     | C <sub>40</sub> H <sub>41</sub> FN <sub>4</sub> O <sub>4</sub> | (M+Na) <sup>+</sup> |
| 685.2631 | 685.3066 | 63.51     | 1 | 60.77     | C <sub>40</sub> H <sub>41</sub> FN <sub>4</sub> O <sub>4</sub> | (M+Na) <sup>+</sup> |

**Figure S25: Molecular Formula Strings Spread sheet**

| Compound  | Molecular Formula Strings                                                                                                          |
|-----------|------------------------------------------------------------------------------------------------------------------------------------|
| <b>3a</b> | <chem>O=C1CC(C2=N/C([C@@H](C)[C@@H]2CCC(OC)=O)=C\3)=C(C1=C/4C)NC4=C/C(C(CC)=C/5C)=NC5=C/C6=C(C(OCC7=CC=CC=C7F)C)C(C)=C3N6</chem>   |
| <b>3b</b> | <chem>O=C1CC(C2=N/C([C@@H](C)[C@@H]2CCC(OC)=O)=C\3)=C(C1=C/4C)NC4=C/C(C(CC)=C/5C)=NC5=C/C6=C(C(OCC7=CC=CC(F)=C7)C)C(C)=C3N6</chem> |
| <b>3c</b> | <chem>O=C1CC(C2=N/C([C@@H](C)[C@@H]2CCC(OC)=O)=C\3)=C(C1=C/4C)NC4=C/C(C(CC)=C/5C)=NC5=C/C6=C(C(OCC7=CC=C(F)C=C7)C)C(C)=C3N6</chem> |
| <b>4a</b> | <chem>O=C1CC(C2=N/C([C@@H](C)[C@@H]2CCC(O)=O)=C\3)=C(C1=C/4C)NC4=C/C(C(CC)=C/5C)=NC5=C/C6=C(C(OCC7=CC=CC=C7F)C)C(C)=C3N6</chem>    |
| <b>4b</b> | <chem>O=C1CC(C2=N/C([C@@H](C)[C@@H]2CCC(O)=O)=C\3)=C(C1=C/4C)NC4=C/C(C(CC)=C/5C)=NC5=C/C6=C(C(OCC7=CC=CC(F)=C7)C)C(C)=C3N6</chem>  |
| <b>4c</b> | <chem>O=C1CC(C2=N/C([C@@H](C)[C@@H]2CCC(O)=O)=C\3)=C(C1=C/4C)NC4=C/C(C(CC)=C/5C)=NC5=C/C6=C(C(OCC7=CC=C(F)C=C7)C)C(C)=C3N6</chem>  |

### Figure S26: HPLC Analysis

Method(s) for HPLC analysis:

- A. Instrument: Agilent 1260 Infinity II system with diode array detector
- B. HPLC parameter: Solvent flow rate: 1.0 mL/min Mobile phase 0.1% (v/v) TFA in water/acetonitrile (5%) over 20 min, Data collected between 410 nm to 420 nm.
- C. HPLC Column: Sunfire C18 analytical column (5  $\mu$ m 4.6  $\times$  250 mm)

| Compound | Retention times (min) | Purity (%) |
|----------|-----------------------|------------|
| <b>3</b> | 16.163                | 96.63      |
| <b>5</b> | 17.799                | 99.01      |
| <b>7</b> | 18.059                | 97.79      |
| <b>4</b> | 12.605                | 99.32      |
| <b>6</b> | 14.927                | 97.89      |
| <b>8</b> | 12.081                | 97.84      |



Figure S27: HPLC chromatogram of 3

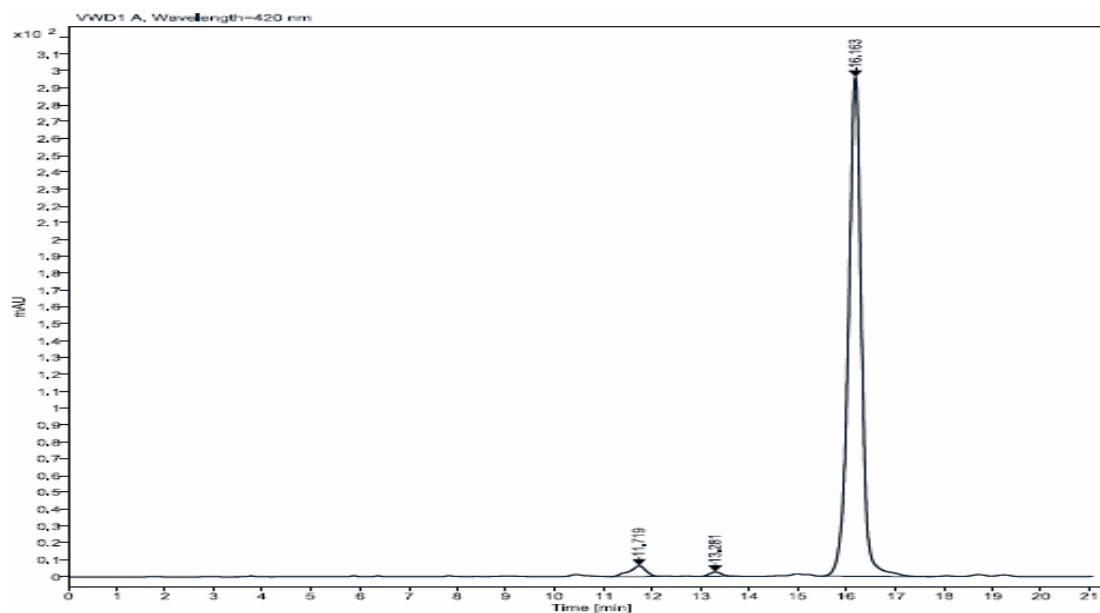

| RT [min] | Type | Width [min] | Area      | Height   | Area%   | Name |
|----------|------|-------------|-----------|----------|---------|------|
| 11.719   | BB   | 0.3410      | 147.5701  | 6.2381   | 2.5915  |      |
| 13.281   | BB   | 0.2731      | 43.7973   | 2.5533   | 0.7691  |      |
| 16.163   | BB   | 0.2827      | 5503.0796 | 296.2810 | 96.6394 |      |
| Sum      |      |             | 5694.4471 |          |         |      |

Figure S28: HPLC chromatogram of 5

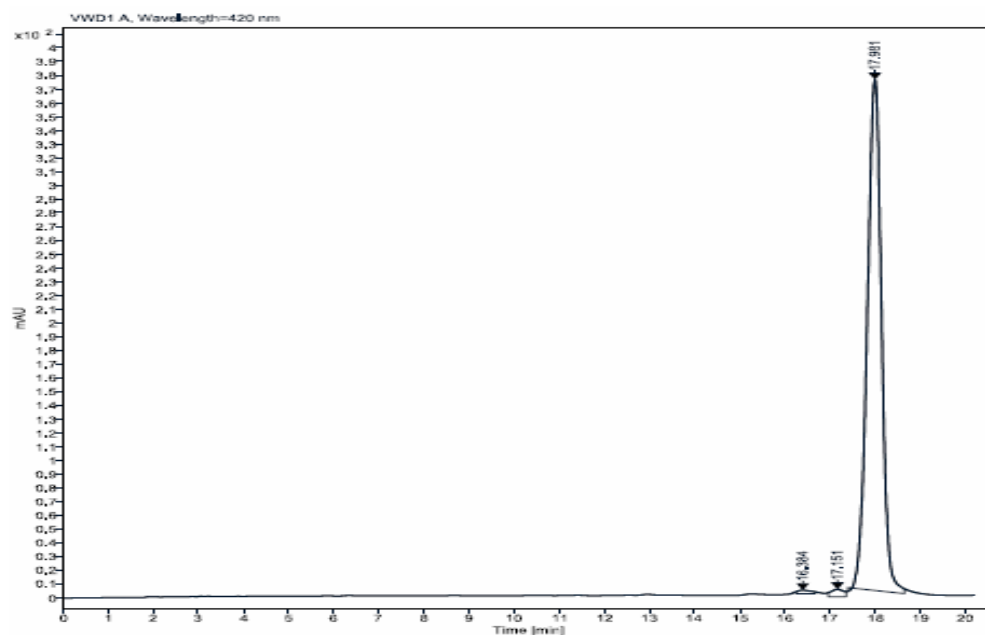

| RT [min] | Type | Width [min] | Area      | Height   | Area%   | Name |
|----------|------|-------------|-----------|----------|---------|------|
| 16.384   | MM   | 0.3623      | 52.4034   | 2.4106   | 0.6307  |      |
| 17.151   | MM   | 0.3239      | 102.7382  | 5.2870   | 1.2365  |      |
| 17.981   | MM   | 0.3656      | 8153.4653 | 371.7141 | 98.1328 |      |
|          |      | Sum         | 8308.6069 |          |         |      |

Figure S29. HPLC chromatogram of 7

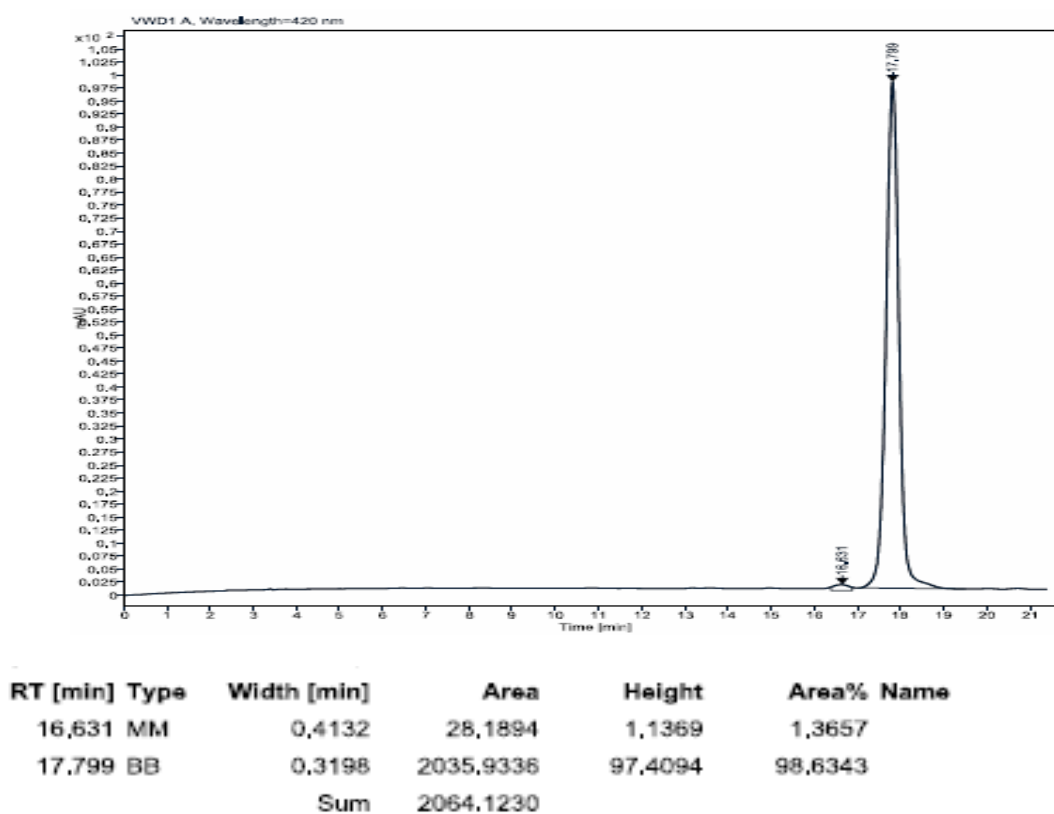

**Figure S30. HPLC chromatogram of 4**

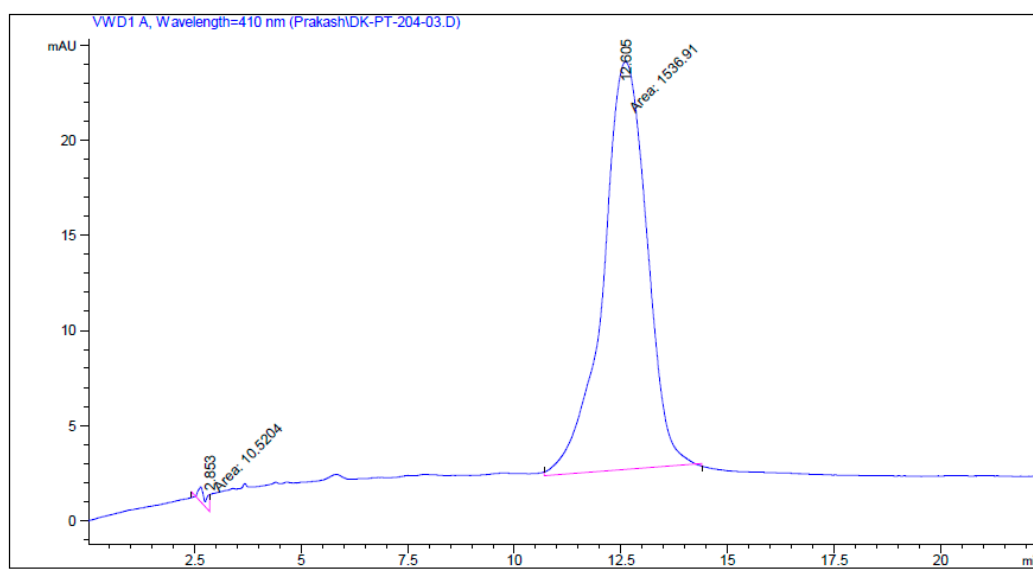

Signal 1: VWD1 A, Wavelength=410 nm

| Peak # | RetTime [min] | Type | Width [min] | Area [mAU*s] | Height [mAU] | Area %  |
|--------|---------------|------|-------------|--------------|--------------|---------|
| 1      | 2.853         | MM   | 0.1966      | 10.52040     | 8.91656e-1   | 0.6799  |
| 2      | 12.605        | MM   | 1.1947      | 1536.90894   | 21.44054     | 99.3201 |

Figure S31. HPLC chromatogram of 6

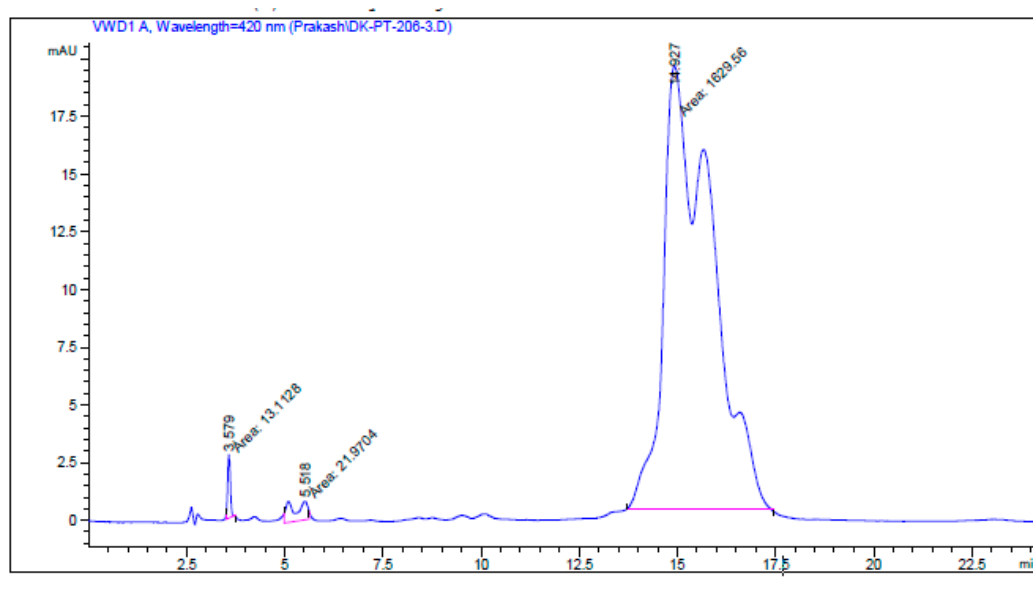

| Peak # | RetTime [min] | Type | Width [min] | Area [mAU*s] | Height [mAU] | Area % |
|--------|---------------|------|-------------|--------------|--------------|--------|
| 1      | 3.579         | MM   | 0.0800      | 13.11280     | 2.73324      | 0.7877 |
| 2      | 5.518         | MM   | 0.4536      | 21.97040     | 8.07332e-1   | 1.3198 |

Figure S32: HPLC chromatogram of 8

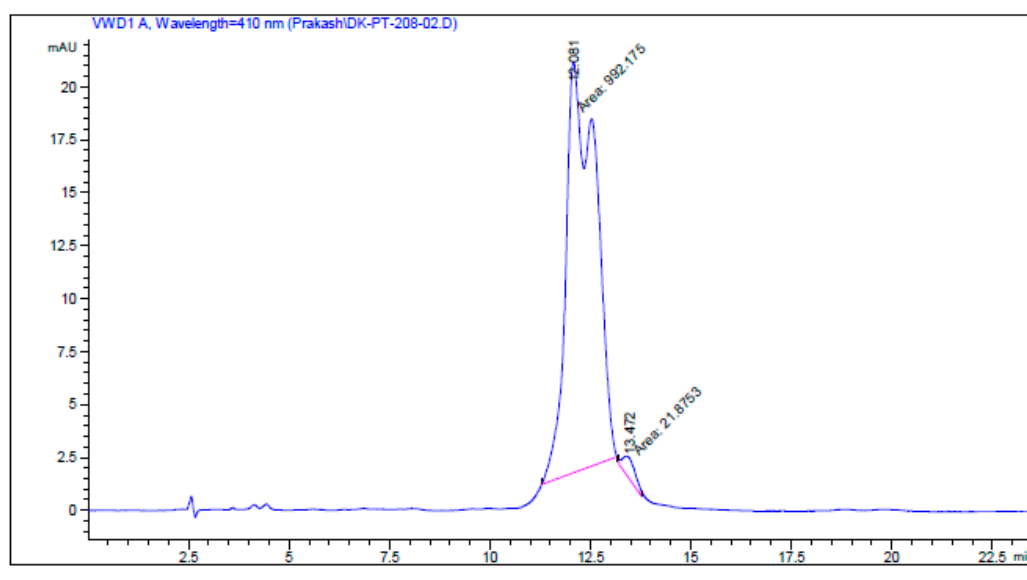

| Peak # | RetTime [min] | Type | Width [min] | Area [mAU*s] | Height [mAU] | Area %  |
|--------|---------------|------|-------------|--------------|--------------|---------|
| 1      | 12.081        | MM   | 0.8530      | 992.17529    | 19.38589     | 97.8428 |
| 2      | 13.472        | MM   | 0.3649      | 21.87533     | 9.99117e-1   | 2.1572  |
